# Supplementary material for: Clearing of Foreign Episomal DNA from Human Cells by CRISPRa-Mediated Activation of Cytidine Deaminases
Source: MDPI journal article supplement (doi:10.3390/ijms21186865), 2020-09-18
Supplement: s1 [file s1]

# Clearing of Foreign Episomal DNA from Human Cells by CRISPRa-Mediated Activation of Cytidine Deaminases

Sergey Brezgin <sup>1,2,†</sup>, Anastasiya Kostyusheva <sup>1,†</sup>, Natalia Ponomareva <sup>1</sup>, Viktoriia Volia <sup>1</sup>, Irina Goptar <sup>3</sup>, Anastasiya Nikiforova <sup>3</sup>, Igor Shilovskiy <sup>2</sup>, Valery Smirnov <sup>2</sup>, Dmitry Kostyushev <sup>1,\*</sup> and Vladimir Chulanov <sup>1,4,‡</sup>

<sup>1</sup> Department of Molecular Biology and Immunopathology of Infectious Diseases, National Medical Research Center for Tuberculosis and Infectious Diseases, 127994 Moscow, Russia; Seegez@mail.ru (S.B.); kostyusheva\_ap@mail.ru (A.K.); ponomareva.n.i13@yandex.ru (N.P.); viktoriyavolya@yandex.ru (V.V.); vladimir@chulanov.ru (V.C.)

<sup>2</sup> Department of Molecular Immunology, Institute of Immunology, Federal Medical Biological Agency, 115522 Moscow, Russia; ip.shilovsky@nrcii.ru (I.S.); vall@mail.mipt.ru (V.S.)

<sup>3</sup> Izmerov Research Institute of Occupational Health, 105275 Moscow, Russia; probirka@list.ru (I.G.); utkina.anastasia@gmail.com (A.N.)

<sup>4</sup> Department of Infectious Diseases, Sechenov First Moscow State Medical University, 119146 Moscow, Russia

\* Correspondence: dkostushev@gmail.com

† These authors contributed equally to this work.

‡ Co-senior authors.

## Supplementary materials

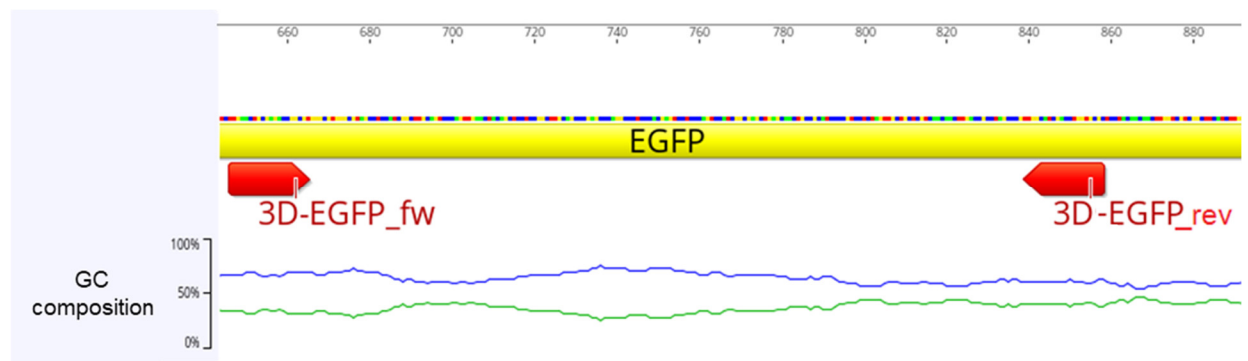

**Figure S1.** Schematic representation of the GFP (EGFP) locus analyzed by 3D-PCR. Blue line: GC composition; green line: AT composition. 3D-EGFP\_fw/3D-EGFP\_rev.

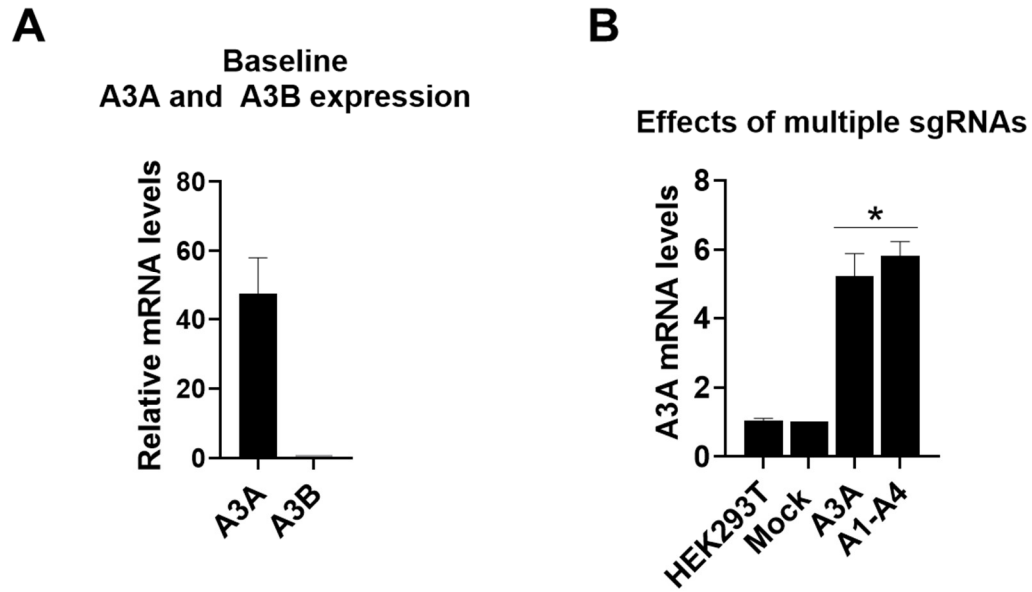

**Figure S2.** Baseline expression of APOBEC3A/3B and effects of multiple sgRNAs on A3A transactivation. (A) Baseline expression of A3A and A3B mRNAs. (B) Activation of A3A by a single sgRNA A3A (A3A2) or multiple sgRNAs (A3A1-4) using dCas9p300 CRISPRa system. A3A/A3B mRNA levels were normalized to GAPDH mRNA. Asterisks indicate statistically significant differences in means compared to HEK293T and Mock control. \* $p < 0.0001$ .
